# Supplementary material
Source: PubMed Central journal article supplement (PMC7786852)
Supplement: JCB886240_Supplemetal_Material.pdf [file JCB886240_Supplemetal_Material.pdf]

# Supplementary information

**Title: High Spatiotemporal Vessel-Specific Hemodynamic Mapping with Multi-Echo Single-Vessel fMRI**

**Authors: Yi He, Maosen Wang, and Xin Yu\***

**Supplementary Figures: 8**

**Supplementary Tables: 3**

**Supplementary Movies: 2**

**Running Title: Multi-Echo Single-Vessel fMRI**

**Corresponding Author: Xin Yu**

Email: [xin.yu@tuebingen.mpg.de](mailto:xin.yu@tuebingen.mpg.de), [xyu9@mgh.harvard.edu](mailto:xyu9@mgh.harvard.edu).

Address: Max-Planck-Ring 11, 72076 Tuebingen Germany

Phone: +49 7071 601-740

Fax: +49 7071 601-701

## Supplementary Figures (8)

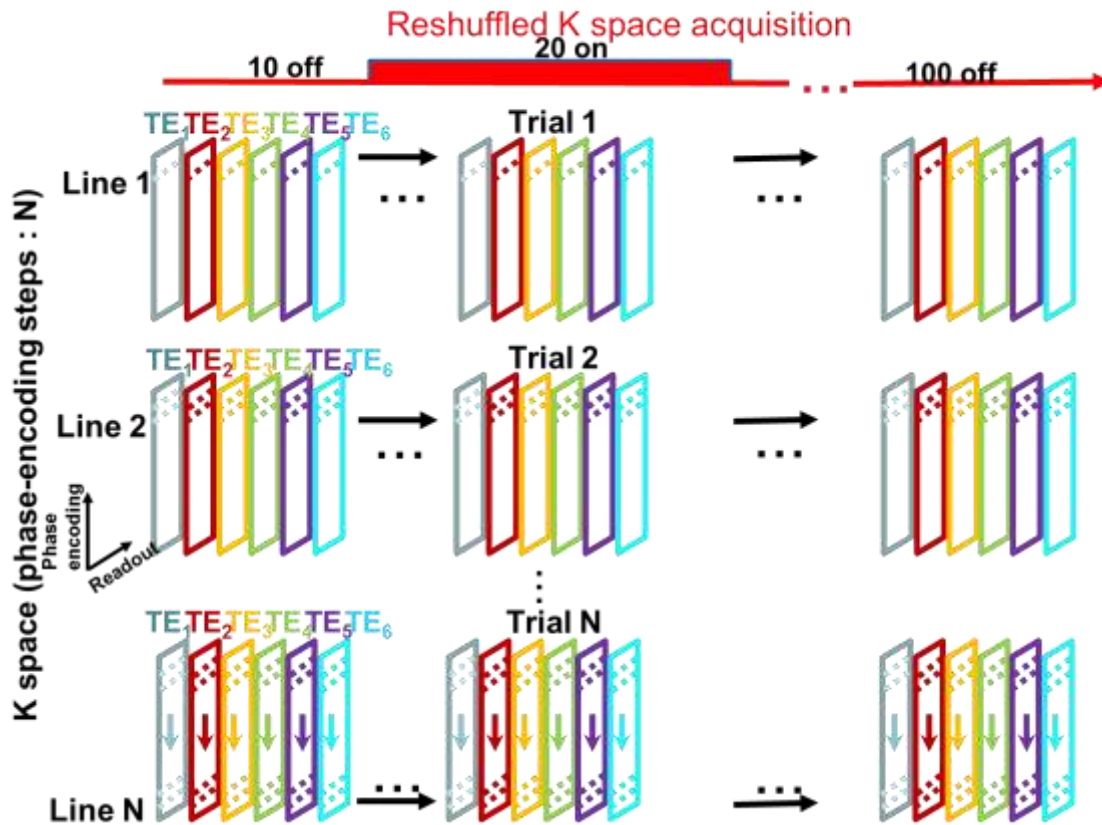

**Supplementary Figure 1. K-space Trajectory of Multi-Echo Single-vessel fMRI (MESV-fMRI).** The k-space of MELS-fMRI is shown in a block-design paradigm with ten scans off, 20 scans on and 100 scans off (the red line). Each box in different colors represents the k-space of the same slice acquired at different TEs. Within the box, each line indicated a k-space line. One line filled the k-space for each image at each trial consecutively. Then the trials were repeated for the number of phase-encoding steps.

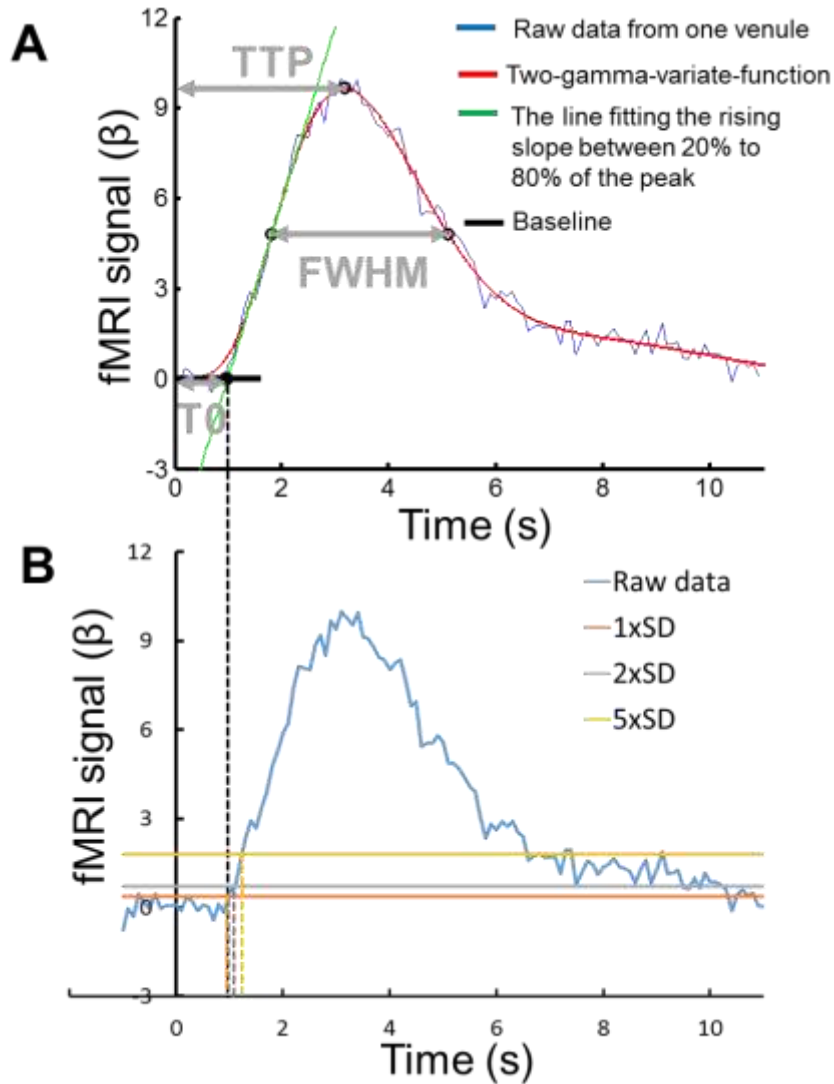

**Supplementary Figure 2. The Definition of T0, TTP, FWHM. (A)** The raw fMRI signal (blue line) was fitted with the two-gamma-variate function (red line). The green line was the fitting slope of fMRI signal between 20% and 80% to the peak amplitude of two-gamma-variate-function. The T0 was estimated as the intercept with the x-axis. The TTP was estimated by the time from the stimulus onset to the peak amplitude of the two-gamma-variate-function. The FWHM was estimated by the time between two points that are half of the maximum amplitude of the two-gamma-variate-function. **(B)** The onset time T0 defined here is between the first standard deviation (SD) and the second SD from baseline.

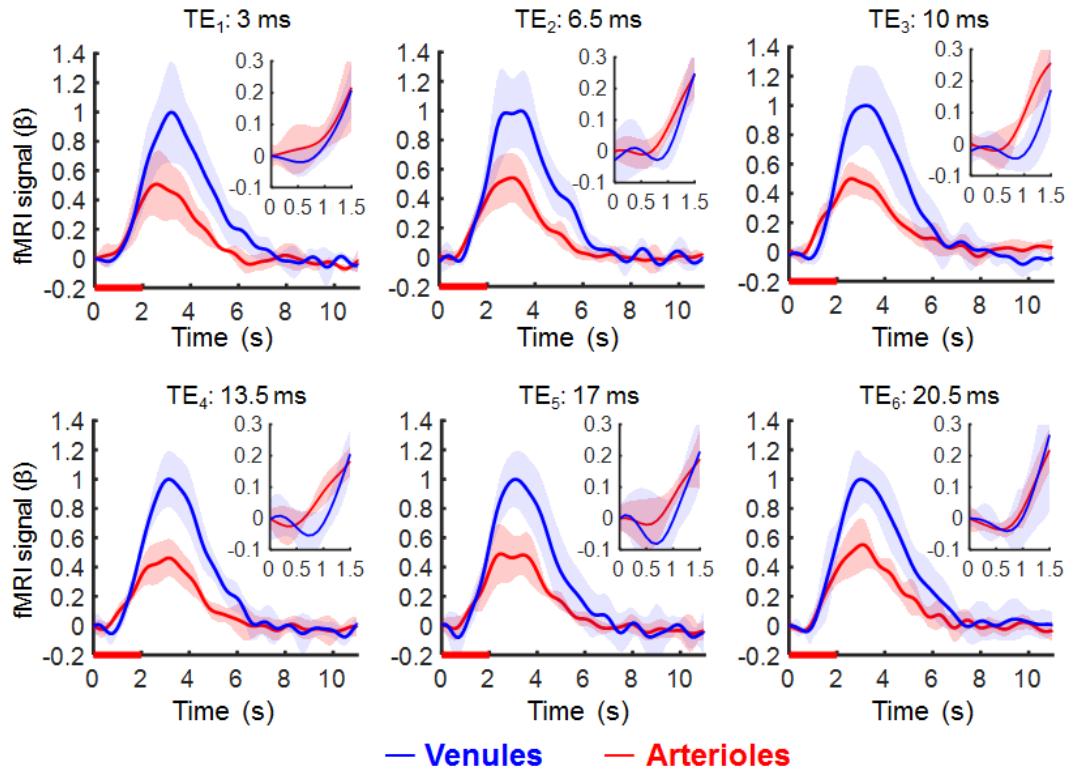

**Supplementary Figure 3.** The normalized fMRI signal at different TEs from venule and arteriole voxels ( $n = 5$  rats, the graphs at different TE, mean  $\pm$  SD)

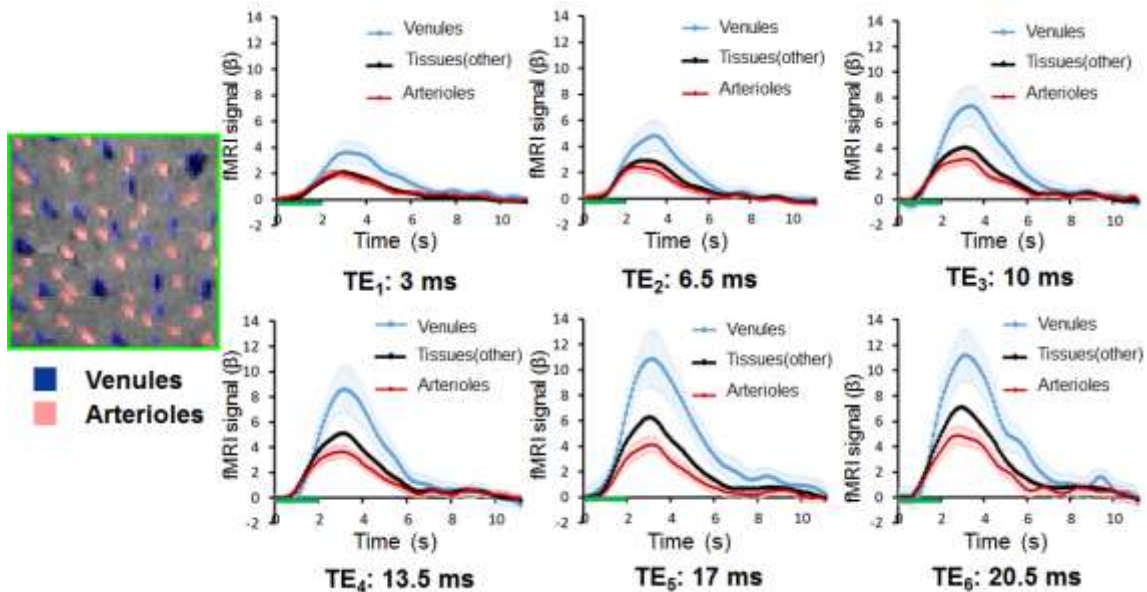

**Supplementary Figure 4.** The averaged time courses of fMRI signal from venule (blue), arteriole (red) and other non-vessel voxels (black) from one representative rat (mean (95% Confidence Intervals (CI))).

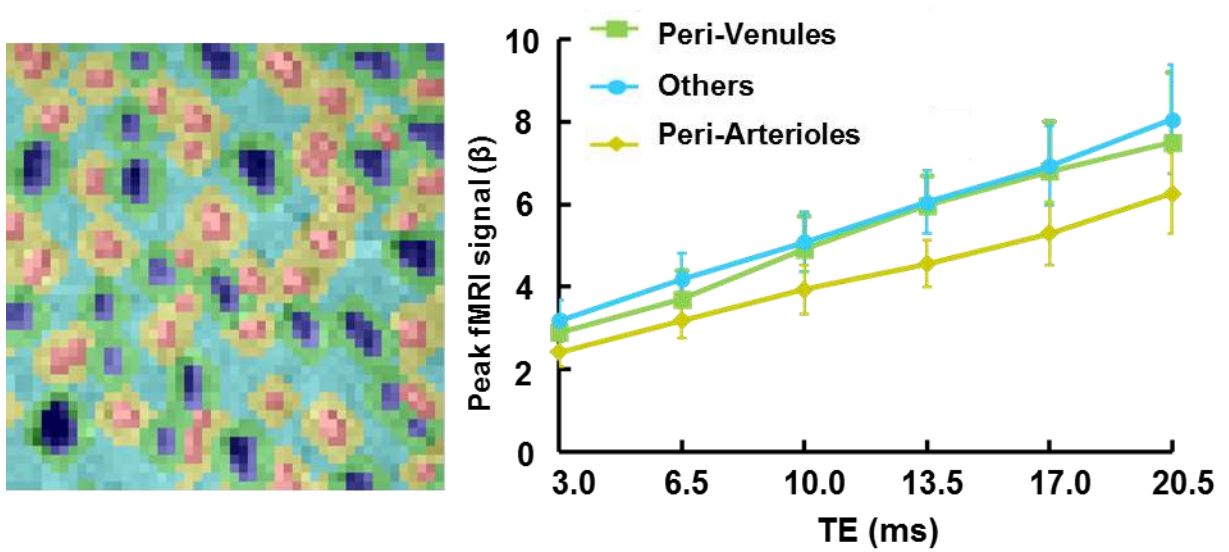

**Supplementary Figure 5.** The peak amplitudes of fMRI signal from peri-venule (green), peri-arteriole (yellow), and others (cyan) voxels are shown at different TEs ( $n = 5$  rats, mean  $\pm$  SD). The left panel is an A-V map demo to show the definition of different ROIs.

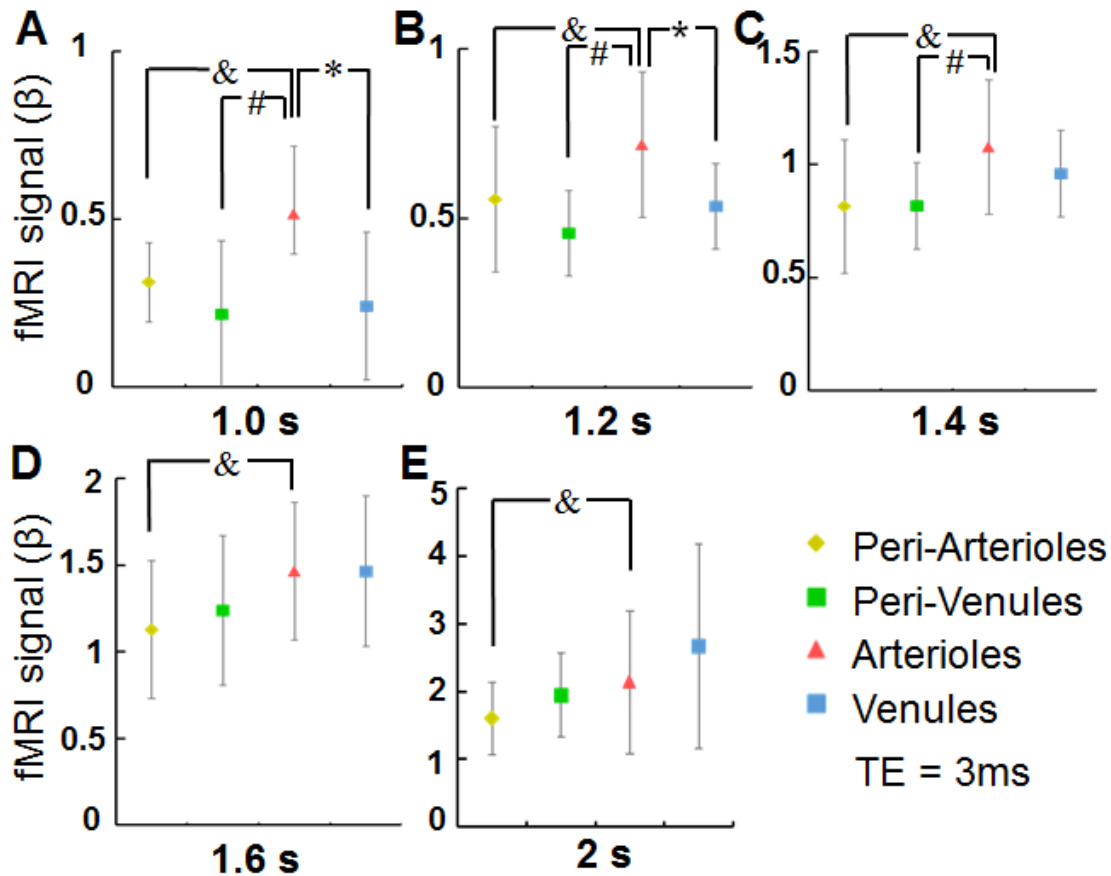

**Supplementary Figure 6. Vessel-specific fMRI signal at different time (TE = 3 ms).**

The amplitudes (1.0s, 1.2s, 1.4s, 1.6s, 2s after the stimulation onset) of the fMRI signal from arteriole (red), venule (blue), peri-venule (green), and peri-arteriole (yellow) voxels were shown at 3 ms TE (n = 5 rats, mean  $\pm$  SD). **(A)** The fMRI signal of arteriole voxels was significantly higher than that of the venule, peri-venule, and peri-arteriole voxels at 1.0s after the stimulation onset. (Paired t-test, n = 5, \*, p = 0.009, &, p = 0.04, #, p = 0.037). **(B)** The fMRI signal of arteriole voxels was significantly higher than that of the venule, peri-venule, peri-arteriole voxels at 1.2 s after the stimulation onset. (Paired t-test, n = 5, \*, p = 0.025, &, p = 0.047, #, p = 0.034) **(C)** The fMRI signal of arteriole voxels was significantly higher than that of peri-venule and peri-arteriole voxels at 1.4 s after the stimulation onset. (Paired t-test, n = 5, &, p = 0.034, #, p = 0.049) **(D)** The fMRI signal of arteriole voxels was significantly higher than that of peri-arteriole voxels at 1.6 s after the stimulation onset. (Paired t-test, n = 5, &, p = 0.049) **(E)** The fMRI signal of venule voxels was significantly higher than that of arteriole voxels at 2.0 s after the stimulation onset. (Paired t-test, n = 5, &, p = 0.042)

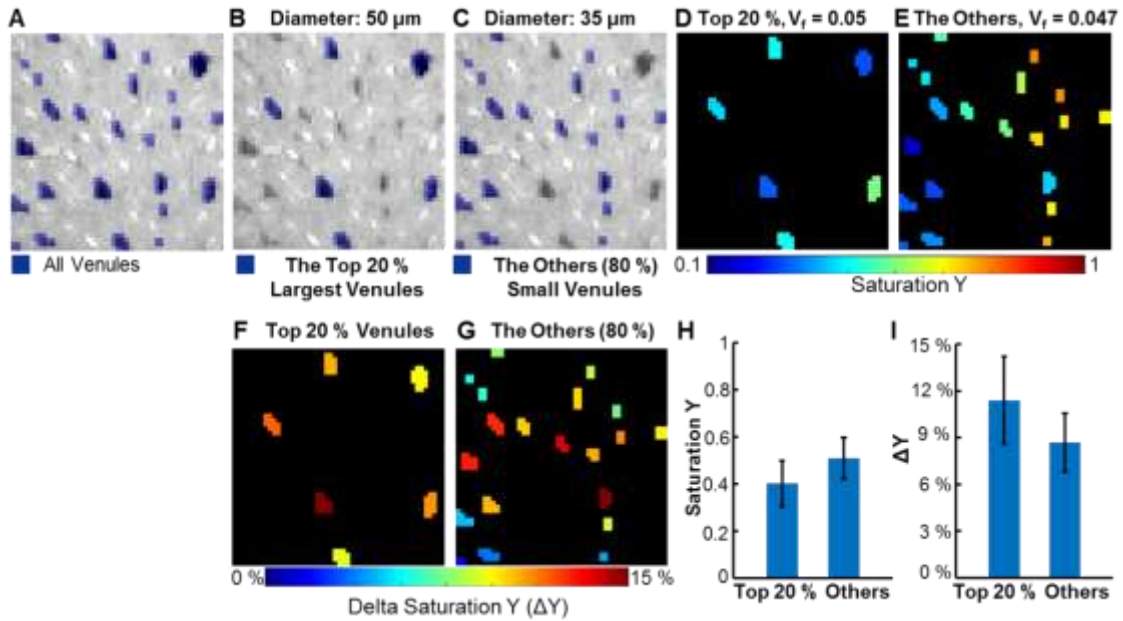

**Supplementary Figure 7. The estimated saturation Y maps and saturation changes  $\Delta Y$  maps of the top 20 % largest venules and the others small venules (A) All individual venules (blue) voxels were identified in the A-V map. (B) The top 20 % largest venules voxels were assumed to have 50  $\mu\text{m}$  diameter. (C) The others small venules (80 %) were assumed to have 35  $\mu\text{m}$  diameters. (D-E) The saturation Y maps of the top 20 % largest venules (D, Volume fraction ( $V_i$ ) = 0.05) and the others 80% small venules (E,  $V_i$  = 0.047). (F-G) The saturation changes  $\Delta Y$  maps of the top 20 % largest venules (F) and the others 80 % small venules (G). (H) The mean Y saturation of the top 20 % largest venules ( $Y_{V_{20\%}} = 0.403 \pm 0.098$ ,  $N_{\text{venules}_{20\%}} = 6$ ) and the others 80 % small venules ( $Y_{V_{80\%}} = 0.509 \pm 0.088$ ,  $N_{\text{venules}_{80\%}} = 19$ , mean (95% CI)). (I) The mean  $\Delta Y$  saturation of the top 20 % largest venules ( $\Delta Y_{V_{20\%}} = 11.4 \pm 2.67$  %,  $N_{\text{venules}_{20\%}} = 6$ , mean (95% CI)) and the others 80 % small venules ( $\Delta Y_{V_{80\%}} = 8.71 \pm 1.87$  %,  $N_{\text{venules}_{80\%}} = 19$ , mean (95% CI))**



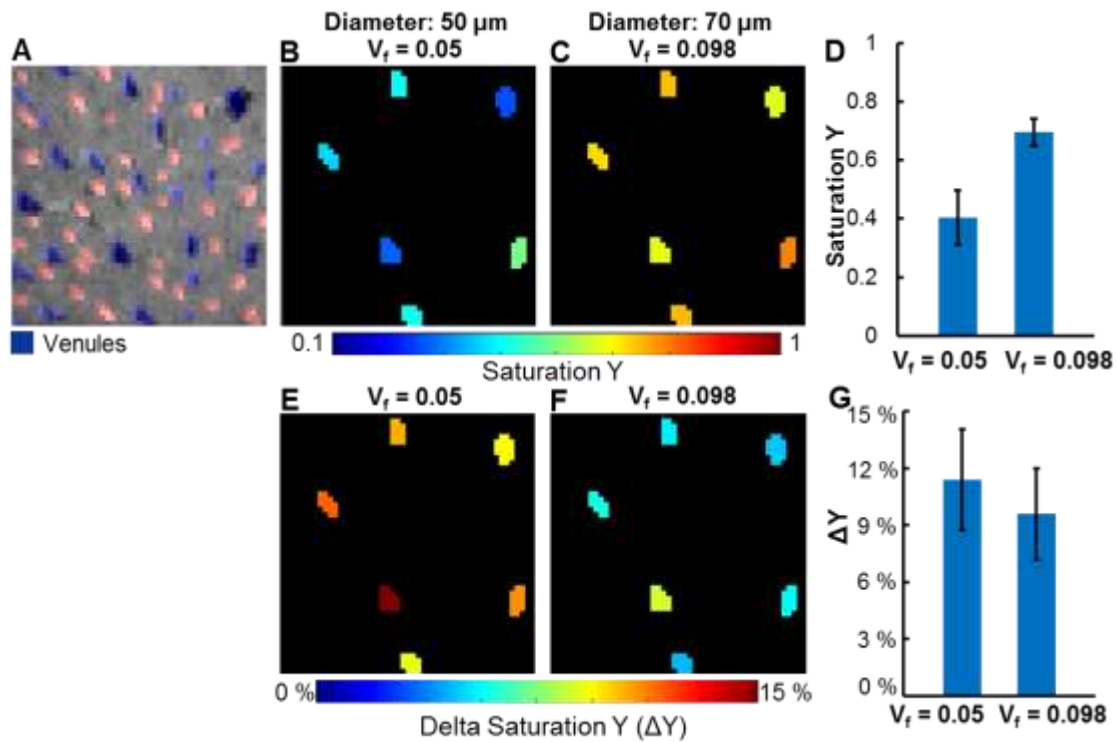

**Supplementary Figure 8. The saturation (Y) and saturation changes ( $\Delta Y$ ) of the top 20% largest venules which were assumed to have 50  $\mu\text{m}$  or 70  $\mu\text{m}$  diameter (A) All venules were defined as the blue markers; (B-C) The Y saturation maps of the top 20 % largest venules which were assumed to have 50  $\mu\text{m}$  diameter (B) or 70  $\mu\text{m}$  diameter (C); (D) The mean Y saturation of the top 20 % largest venules which were assumed to have 50  $\mu\text{m}$  diameter ( $Y_{V_{20\%}} = 0.403 \pm 0.098$ ) or 70  $\mu\text{m}$  diameter ( $Y_{V_{20\%}} = 0.695 \pm 0.047$ ,  $N_{\text{venules}_{20\%}} = 6$ ; mean  $\pm$  SD) (E-F) The saturation changes  $\Delta Y$  maps of the top 20 % largest venules which were assumed to have 50  $\mu\text{m}$  diameter (E) or 70  $\mu\text{m}$  diameter (F); (G) The mean  $\Delta Y$  saturation of the top 20 % largest venules which were assumed to have 50  $\mu\text{m}$  diameter ( $\Delta Y_{V_{20\%}} = 11.4 \pm 2.67$  %) or 70  $\mu\text{m}$  diameter ( $\Delta Y_{V_{20\%}} = 9.6 \pm 2.40$  %,  $N_{\text{venules}_{20\%}} = 6$ , mean  $\pm$  SD)**



### Supplementary Tables (3)

**Supplementary Table 1.** The volume fraction ( $V_f$ ) and the calculated saturation ( $Y$ ) of venules and arterioles with the diameter from 35  $\mu\text{m}$  to 70  $\mu\text{m}$ . ( $N_{\text{venules}} = 25$ , Venule ROI size:  $10.04 \pm 1.82$ ;  $N_{\text{arterioles}} = 35$ , Arteriole ROI size:  $7.66 \pm 0.91$ ; mean (95% CI))

| Diameter                                  | 35 $\mu\text{m}$  |                   | 50 $\mu\text{m}$  |                   | 70 $\mu\text{m}$  |                   |
|-------------------------------------------|-------------------|-------------------|-------------------|-------------------|-------------------|-------------------|
|                                           | Venules           | Arterioles        | Venules           | Arterioles        | Venules           | Arterioles        |
| <b>Volume Fraction (<math>V_f</math>)</b> | <b>0.04</b>       | <b>0.05</b>       | <b>0.07</b>       | <b>0.1</b>        | <b>0.15</b>       | <b>0.2</b>        |
| <b>Saturation (<math>Y</math>)</b>        | $0.386 \pm 0.087$ | $0.741 \pm 0.039$ | $0.649 \pm 0.050$ | $0.871 \pm 0.018$ | $0.836 \pm 0.023$ | $0.935 \pm 0.010$ |

**Supplementary Table 2.** The saturation changes ( $\Delta Y$ ) of venules and arterioles. ( $N_{\text{venules}} = 25$ ;  $N_{\text{arterioles}} = 35$ ; mean (95% CI); all the venules and arterioles were assumed to have 35  $\mu\text{m}$ , 50  $\mu\text{m}$  and 70  $\mu\text{m}$ , respectively)

| $\Delta$ Diameter  | Diameter $V_f$ | 35 $\mu\text{m}$    |                     | 50 $\mu\text{m}$   |                    | 70 $\mu\text{m}$   |                    |
|--------------------|----------------|---------------------|---------------------|--------------------|--------------------|--------------------|--------------------|
|                    |                | 0.04                | 0.05                | 0.07               | 0.1                | 0.15               | 0.2                |
| <b>Venules:</b>    | <b>0 %</b>     | $11.14 \pm 1.92 \%$ |                     | $6.36 \pm 1.09 \%$ |                    | $2.97 \pm 0.52 \%$ |                    |
| <b>Arterioles:</b> | <b>5 %</b>     |                     | $6.53 \pm 0.43 \%$  |                    | $3.26 \pm 0.20 \%$ |                    | $1.63 \pm 0.12 \%$ |
|                    | <b>10 %</b>    |                     | $9.31 \pm 0.71 \%$  |                    | $4.65 \pm 0.37 \%$ |                    | $2.33 \pm 0.18 \%$ |
|                    | <b>15 %</b>    |                     | $12.22 \pm 1.25 \%$ |                    | $6.11 \pm 0.55 \%$ |                    | $3.05 \pm 0.28 \%$ |
|                    |                |                     |                     |                    |                    |                    |                    |

**Supplementary Table 3.** The  $V_f$ ,  $Y$  and  $\Delta Y$  of the top 20 % largest venules and the others (80 %) small venules. (Top 20 % venules:  $N_{\text{venules}_{20\%}} = 6$ , the top 20 % largest venules were assumed to have 50  $\mu\text{m}$  diameter; The others 80 % venules:  $N_{\text{venules}_{80\%}} = 19$ , the others 80 % small venules were assumed to have 35  $\mu\text{m}$  diameters, mean (95 % CI))

| Venules                                   | The Top 20 % Largest Venules | The Others (80%) Small Venules |
|-------------------------------------------|------------------------------|--------------------------------|
| <b>Diameter</b>                           | 50 $\mu\text{m}$             | 35 $\mu\text{m}$               |
| <b>ROI Voxels</b>                         | $15.67 \pm 2.167$            | $8.26 \pm 1.573$               |
| <b>Volume Fraction (<math>V_f</math>)</b> | 0.05                         | 0.047                          |
| <b>Saturation (<math>Y</math>)</b>        | $0.403 \pm 0.098$            | $0.509 \pm 0.088$              |
| <b><math>\Delta Y</math></b>              | $11.4 \pm 2.80 \%$           | $8.71 \pm 1.87 \%$             |

## Supplementary Movies (2)

**Supplementary Movie 1.** The spatial patterns of the vessel-specific fMRI signal at different TEs. The voxel-wise BOLD fMRI signal was demonstrated from 7x7 voxel matrix covering one individual venule (middle panel: the dark voxel in the green square, in-plane resolution: 50 x 50  $\mu\text{m}$ ). The red cursor in the center voxel (100 ms temporal resolution) indicated the fMRI signal changes at 6.5 ms TE (right panel).

**Supplementary Movie 2.** The  $T_2^*$ -based fMRI maps from two representative rats.  $T_2^*$ -based fMRI maps (middle panel) were overlapped with the A-V map (left panel). The most active voxels (red color, 100x100  $\mu\text{m}$ ) were primarily located at the underlying venule voxels (black dots, right panel).
